# Supplementary material for: Evaluation of gridding procedures for air temperature over Southern Africa
Source: Copernicus journal article supplement (doi:10.5194/asr-14-163-2017), 2017-06-15
Supplement: Supplementary file 1 [file asr-14-163-2017-supplement.zip]

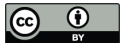

## *Supplement of*

# **Evaluation of gridding procedures for air temperature over Southern Africa**

**Kai-Uwe Eiselt et al.**

*Correspondence to:* Frank Kaspar ([frank.kaspar@dwd.de](mailto:frank.kaspar@dwd.de)) and Jens O. Riede ([jens-olaf.riede@dwd.de](mailto:jens-olaf.riede@dwd.de))

- asr-14-163-2017-supplement-title-page.pdf
- R3D
  - R3D\_Maps
    - \* R3D\_2014\_09\_z1000\_nmax4\_p2.png
    - \* R3D\_2014\_10\_z1000\_nmax4\_p2.png
    - \* R3D\_2014\_11\_z1000\_nmax4\_p2.png
    - \* R3D\_2014\_12\_z1000\_nmax4\_p2.png
    - \* R3D\_2015\_01\_z1000\_nmax4\_p2.png
    - \* R3D\_2015\_02\_z1000\_nmax4\_p2.png
    - \* R3D\_2015\_03\_z1000\_nmax4\_p2.png
    - \* R3D\_2015\_04\_z1000\_nmax4\_p2.png
    - \* R3D\_2015\_05\_z1000\_nmax4\_p2.png
    - \* R3D\_2015\_06\_z1000\_nmax4\_p2.png
    - \* R3D\_2015\_07\_z1000\_nmax4\_p2.png
    - \* R3D\_2015\_08\_z1000\_nmax4\_p2.png
    - \* R3D\_2015\_09\_z1000\_nmax4\_p2.png
    - \* R3D\_2015\_10\_z1000\_nmax4\_p2.png
    - \* R3D\_2015\_11\_z1000\_nmax4\_p2.png
    - \* R3D\_2015\_12\_z1000\_nmax4\_p2.png
    - \* R3D\_2016\_01\_z1000\_nmax4\_p2.png
    - \* R3D\_2016\_02\_z1000\_nmax4\_p2.png
    - \* R3D\_2016\_03\_z1000\_nmax4\_p2.png
    - \* R3D\_2016\_04\_z1000\_nmax4\_p2.png
    - \* R3D\_2016\_05\_z1000\_nmax4\_p2.png
    - \* R3D\_2016\_06\_z1000\_nmax4\_p2.png
    - \* R3D\_2016\_07\_z1000\_nmax4\_p2.png
    - \* R3D\_2016\_08\_z1000\_nmax4\_p2.png
  - R3D\_Res\_Maps

- \* R3D\_Res\_2014\_09\_z1000\_nmax4\_p2.png
- \* R3D\_Res\_2014\_10\_z1000\_nmax4\_p2.png
- \* R3D\_Res\_2014\_11\_z1000\_nmax4\_p2.png
- \* R3D\_Res\_2014\_12\_z1000\_nmax4\_p2.png
- \* R3D\_Res\_2015\_01\_z1000\_nmax4\_p2.png
- \* R3D\_Res\_2015\_02\_z1000\_nmax4\_p2.png
- \* R3D\_Res\_2015\_03\_z1000\_nmax4\_p2.png
- \* R3D\_Res\_2015\_04\_z1000\_nmax4\_p2.png
- \* R3D\_Res\_2015\_05\_z1000\_nmax4\_p2.png
- \* R3D\_Res\_2015\_06\_z1000\_nmax4\_p2.png
- \* R3D\_Res\_2015\_07\_z1000\_nmax4\_p2.png
- \* R3D\_Res\_2015\_08\_z1000\_nmax4\_p2.png
- \* R3D\_Res\_2015\_09\_z1000\_nmax4\_p2.png
- \* R3D\_Res\_2015\_10\_z1000\_nmax4\_p2.png
- \* R3D\_Res\_2015\_11\_z1000\_nmax4\_p2.png
- \* R3D\_Res\_2015\_12\_z1000\_nmax4\_p2.png
- \* R3D\_Res\_2016\_01\_z1000\_nmax4\_p2.png
- \* R3D\_Res\_2016\_02\_z1000\_nmax4\_p2.png
- \* R3D\_Res\_2016\_03\_z1000\_nmax4\_p2.png
- \* R3D\_Res\_2016\_04\_z1000\_nmax4\_p2.png
- \* R3D\_Res\_2016\_05\_z1000\_nmax4\_p2.png
- \* R3D\_Res\_2016\_06\_z1000\_nmax4\_p2.png
- \* R3D\_Res\_2016\_07\_z1000\_nmax4\_p2.png
- \* R3D\_Res\_2016\_08\_z1000\_nmax4\_p2.png

- Supplementary\_information.doc

The copyright of individual parts of the supplement might differ from the CC BY 3.0 License.
